# Supplementary material for: A fluorescent activatable probe for imaging intracellular Mg2+
Source: PubMed Central journal article supplement (PMC5789582; doi:10.1039/c7ob02965a), 2017-12-19
Supplement: OB-016-C7OB02965A-s001.pdf [file OB-016-C7OB02965A-s001.pdf]

**Electronic Supplementary Information**

**A Fluorescent Activatable Probe for Imaging Intracellular Mg<sup>2+</sup>**

Ryan Treadwell, Fabio de Moliner, Ramon Subiros-Funosas, Toby Hurd, Kirsten Knox  
and Marc Vendrell

**Table of Contents:**

1. Synthetic procedures.
2. NMR spectra.
3. Additional spectroscopy and imaging data.

## 1. Synthetic procedures.

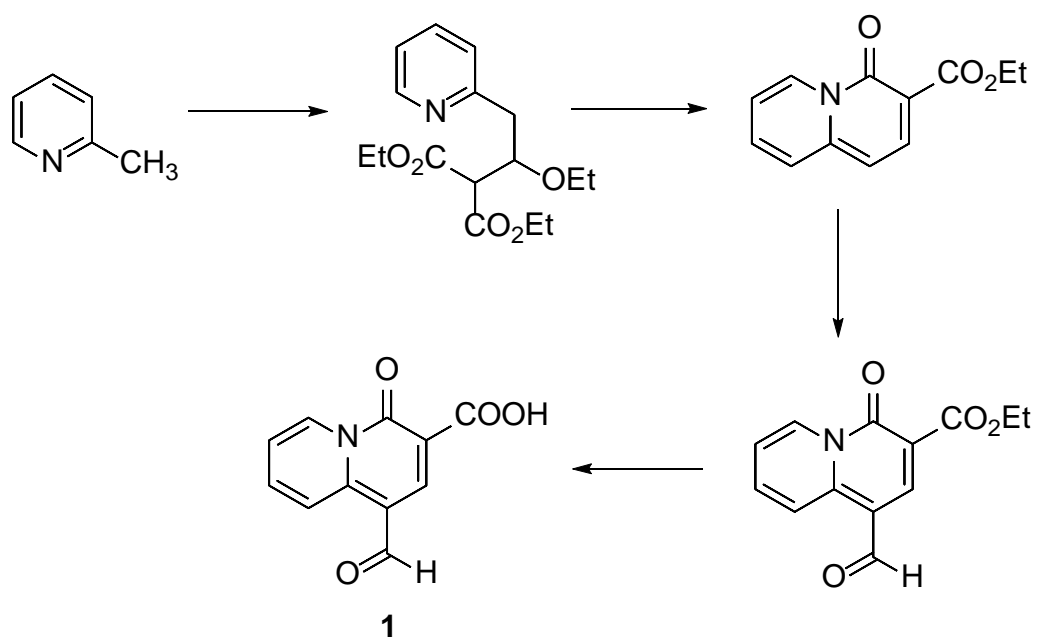

**Scheme S1.** Synthetic scheme for the preparation of the aldehyde **1**.

## 2-[1-ethoxy-2-(2-pyridinyl)ethyl]-1,3-diethyl ester

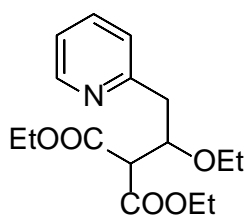

Picoline (5 g, 54 mmol, 1 eq.) was dissolved in dry THF (30 mL) and the resulting solution was slowly added under N<sub>2</sub> at -78°C to a 2.0 M solution of LDA in THF/heptane/ethylbenzene (33 mL, 66 mmol, 1.25 eq.). After stirring for 30 min, ethoxymethylmalonate (12.74 g, 5.9 mmol, 1.1 eq.) in dry THF (30 mL) was added over a 10-min period and the reaction was left to stir for further 20 min while allowing the temperature to increase to -20°C. After 3 h, the reaction was judged complete by TLC and HPLC-MS, poured into deionised H<sub>2</sub>O (500 mL) and extracted using CH<sub>2</sub>Cl<sub>2</sub> (3 × 300 mL). The combined organic layers were dried over MgSO<sub>4</sub> and concentrated *in vacuo*. Flash column chromatography (EtOAc/hexane, 1:1) yielded the product (8.64 g) as a dark orange oil in 52% yield.

<sup>1</sup>H NMR (500 MHz, CDCl<sub>3</sub>) δ 8.55 (ddd, *J* = 5.0, 1.8, 0.9 Hz, 1H), 7.62 (td, *J* = 7.7, 1.9 Hz, 1H), 7.24 (m, 1H), 7.15 (ddd, *J* = 7.5, 4.9, 1.2 Hz, 1H), 4.49 (m, 1H), 4.20 (dq, *J* = 8.4, 7.1 Hz, 4H), 3.63 (d, *J* = 8.0 Hz, 1H), 3.47 (dq, *J* = 9.1, 7.0 Hz, 2H), 3.31 (dq, *J* = 9.1, 7.0 Hz, 1H), 3.22 (m, 1H), 1.27 (td, *J* = 7.1, 3.8 Hz, 3H), 0.98 (t, *J* = 7.0 Hz, 6H) ppm.

<sup>13</sup>C NMR (125 MHz, CDCl<sub>3</sub>) δ 167.5, 167.3, 158.2, 148.9, 136.4, 124.6, 121.6, 66.4, 61.4, 61.4, 56.9, 41.4, 15.2, 14.1, 14.0 ppm.

### Ethyl 4-oxo-4H-quinolizine-3-carboxylate

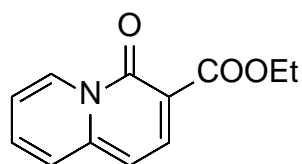

2-[1-ethoxy-2-(2-pyridinyl)ethyl]-1,3-diethyl ester (6 g, 27.62 mmol) was dissolved in xylene (60 mL) and heated under reflux for 48 h. Afterwards, the solvent was removed *in vacuo* and flash column chromatography (EtOAc/hexane, 1:1) yielded the product (1.06 g) as an orange crystalline solid in 25% yield.

$^1\text{H}$  NMR (500 MHz,  $\text{CDCl}_3$ )  $\delta$  8.55 (ddd,  $J = 5.0, 1.8, 0.9$  Hz, 1H), 7.62 (td,  $J = 7.7, 1.9$  Hz, 1H), 7.26 (dt,  $J = 7.9, 1.1$  Hz, 1H), 7.15 (ddd,  $J = 7.5, 4.9, 1.2$  Hz, 1H), 4.48 – 4.42 (m, 1H), 4.20 (dq,  $J = 8.4, 7.1$  Hz, 4H), 3.63 (d,  $J = 8.0$  Hz, 1H), 3.47 (dq,  $J = 9.1, 7.0$  Hz, 1H), 3.31 (dq,  $J = 9.1, 7.0$  Hz, 1H), 3.22 – 3.07 (m, 2H), 1.27 (td,  $J = 7.1, 3.8$  Hz, 6H), 0.98 (t,  $J = 7.0$  Hz, 3H) ppm.

$^{13}\text{C}$  NMR (125 MHz,  $\text{CDCl}_3$ )  $\delta$  166.2, 155.9, 146.1, 141.0, 133.5, 129.3, 125.4, 116.4, 106.9, 102.2, 60.9, 14.5 ppm.

### Ethyl 1-formyl-4-oxo-4H-quinolizine-3-carboxylate

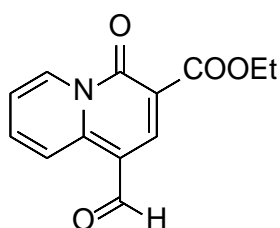

$\text{POCl}_3$  (1.35 mL, 14.5 mmol, 3 eq.) was added dropwise over 5 min to a solution of 2-[1-ethoxy-2-(2-pyridinyl)ethyl]-1,3-diethyl ester (1.05 g, 4.93 mmol, 1 eq.) in 2.5 mL of DMF and left to stir at r.t.. After 1 h, the reaction was judged complete by TLC, and the crude was diluted with  $\text{H}_2\text{O}$  (100 mL) and extracted using  $\text{CH}_2\text{Cl}_2$  (3 x 100 mL). The combined organic layers were dried over  $\text{MgSO}_4$  and concentrated under reduced pressure. Flash column chromatography (EtOAc/hexane, 4:1) yielded the product (1.04 g) as a yellow solid in 87% yield.

$^1\text{H}$  NMR (500 MHz,  $\text{CDCl}_3$ )  $\delta$  9.93 (s, 1H), 9.61 (d,  $J = 1.3$  Hz, 1H), 9.58 (m, 1H), 8.82 (s, 1H), 8.05 (m, 1H), 7.54 (td,  $J = 7.0, 1.4$  Hz, 1H), 4.48 (q,  $J = 7.1$  Hz, 2H), 1.47 (t,  $J = 7.1$  Hz, 3H) ppm.

$^{13}\text{C}$  NMR (125 MHz,  $\text{CDCl}_3$ )  $\delta$  188.2, 164.8, 149.0, 145.7, 139.2, 130.7, 123.9, 119.2, 108.8, 105.7, 61.4, 14.5 ppm.

## 2. NMR spectra

### <sup>1</sup>H-NMR

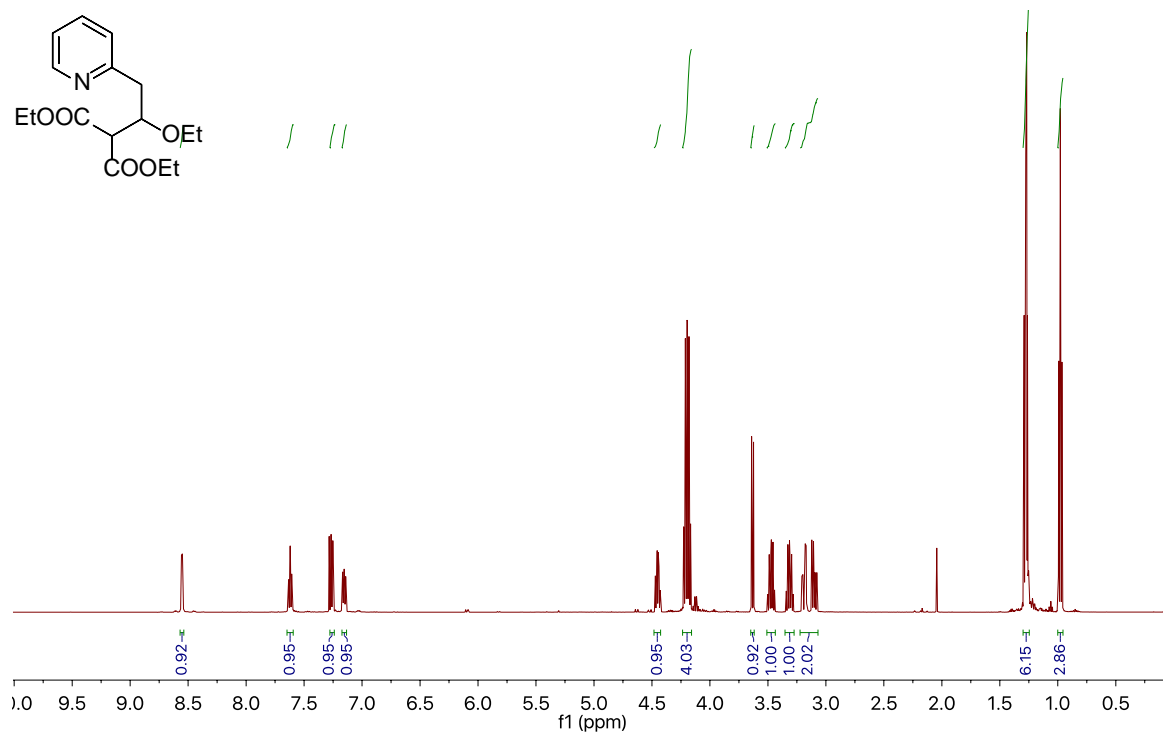

### <sup>13</sup>C-NMR

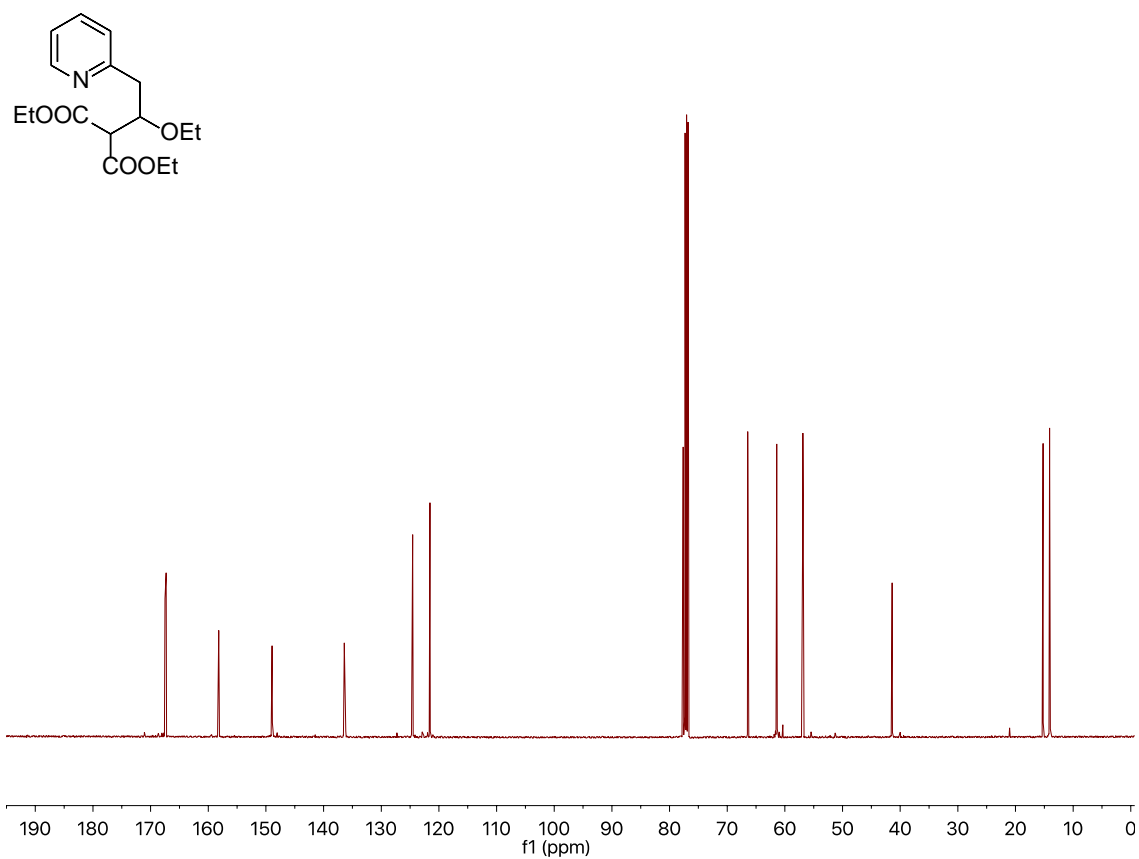

# <sup>1</sup>H-NMR

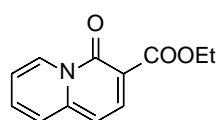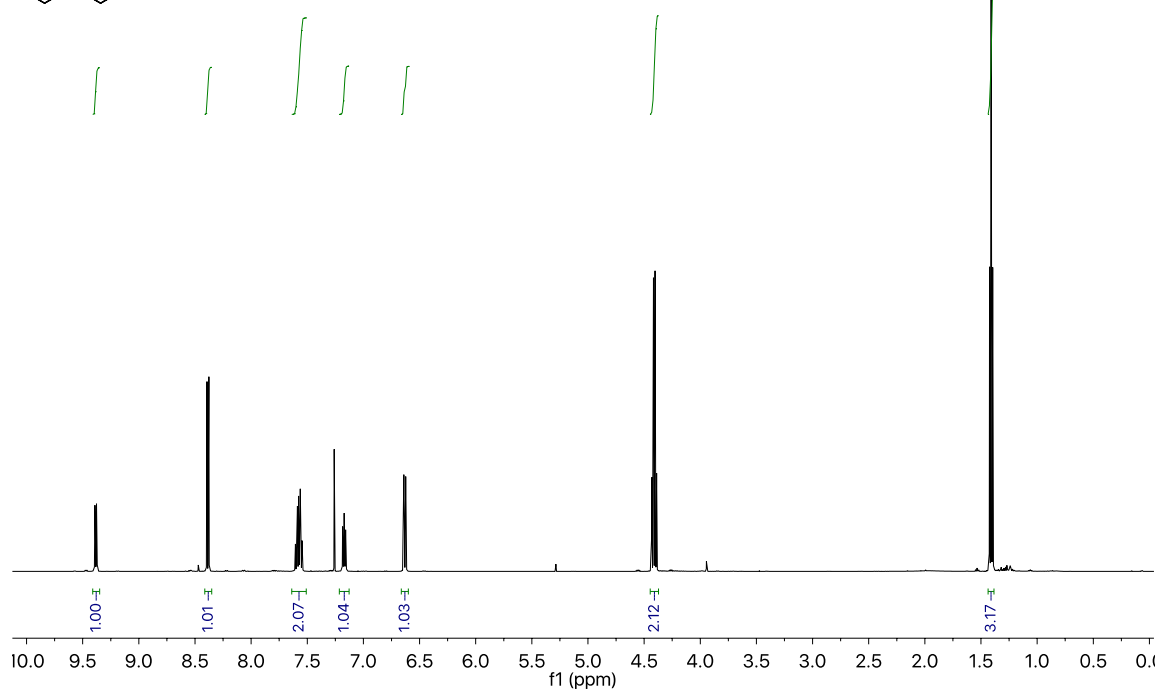

# <sup>13</sup>C-NMR

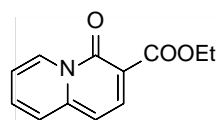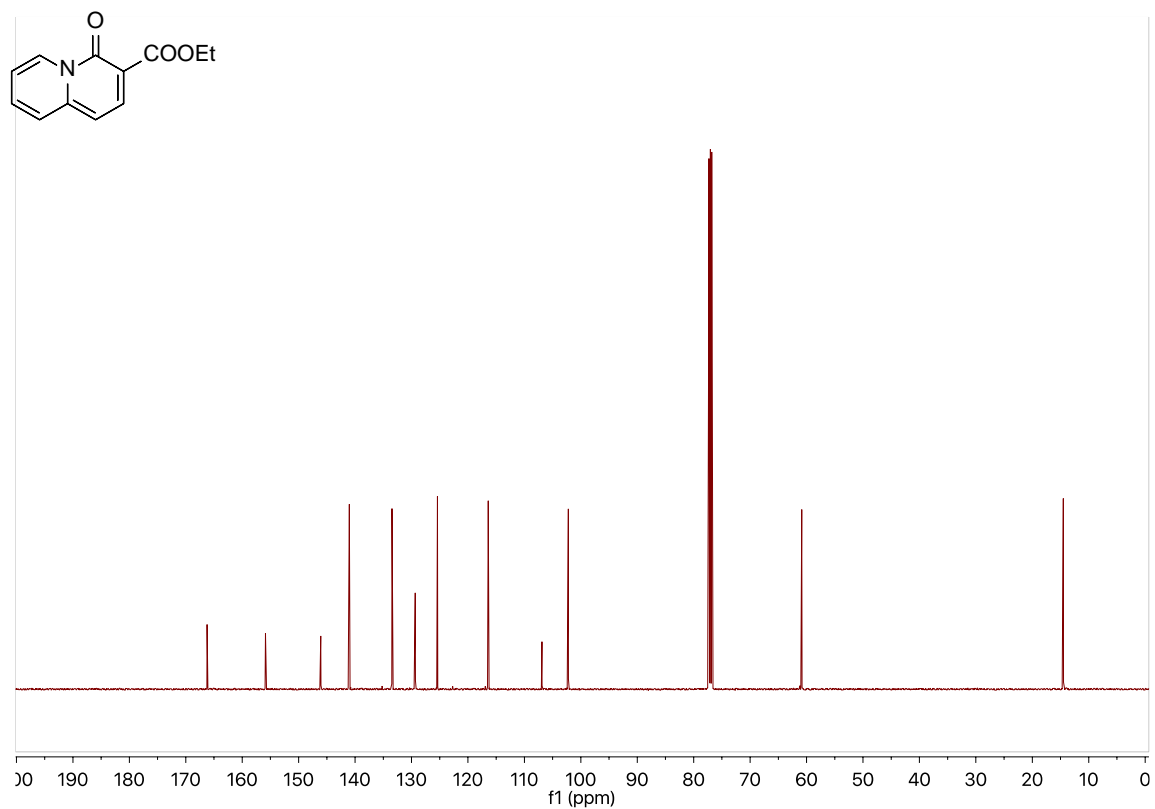

# <sup>1</sup>H-NMR

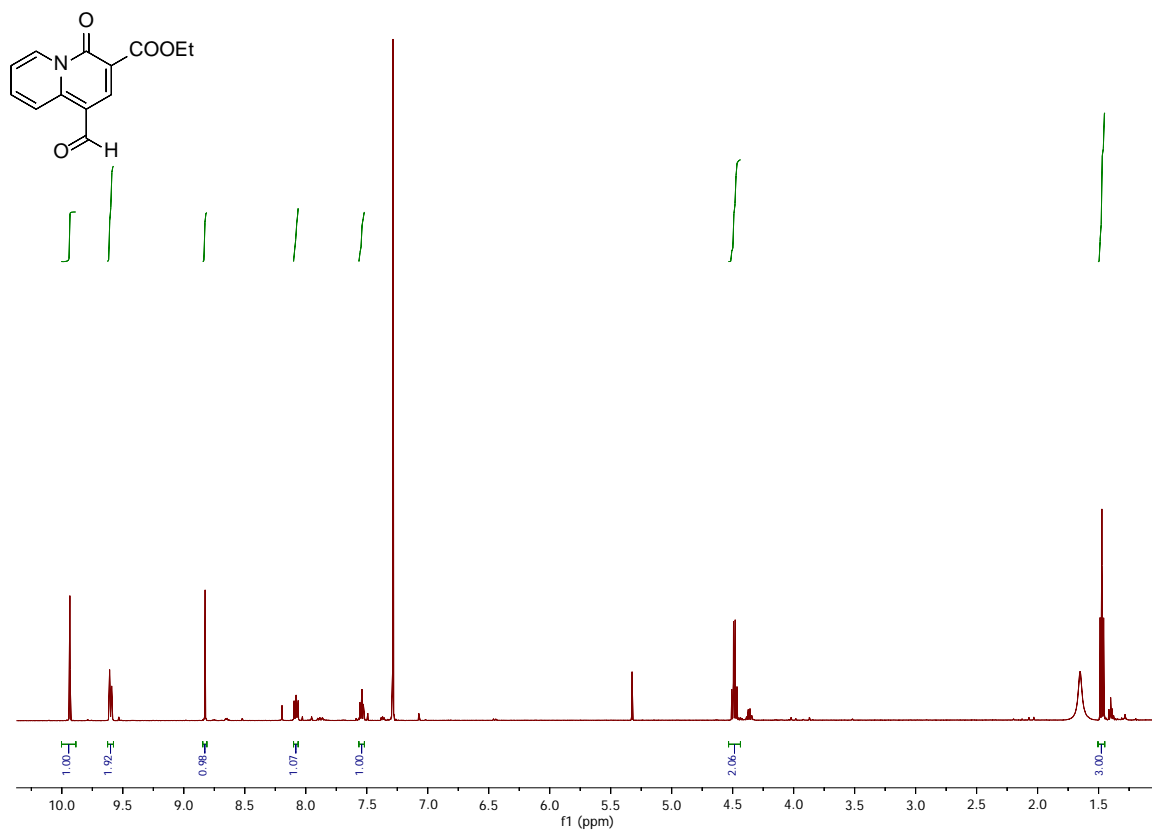

# <sup>13</sup>C-NMR

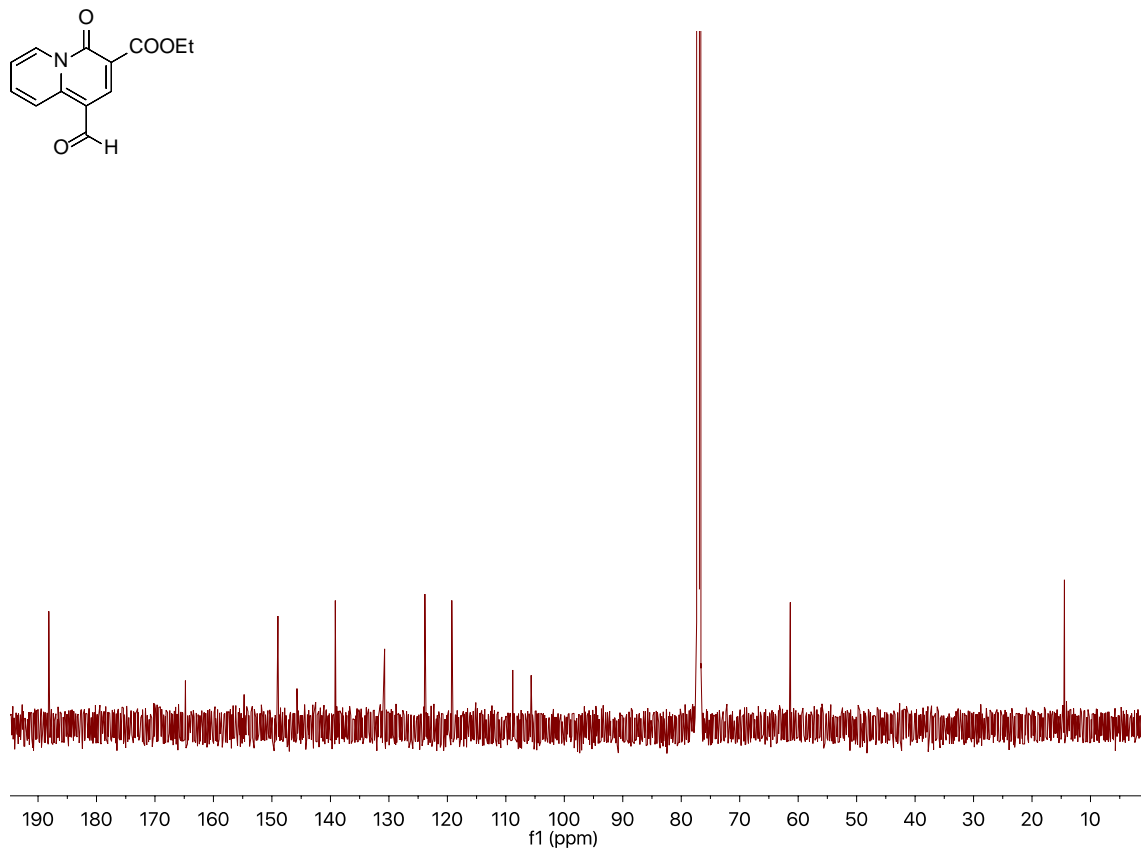



### <sup>1</sup>H-NMR (compound 1)

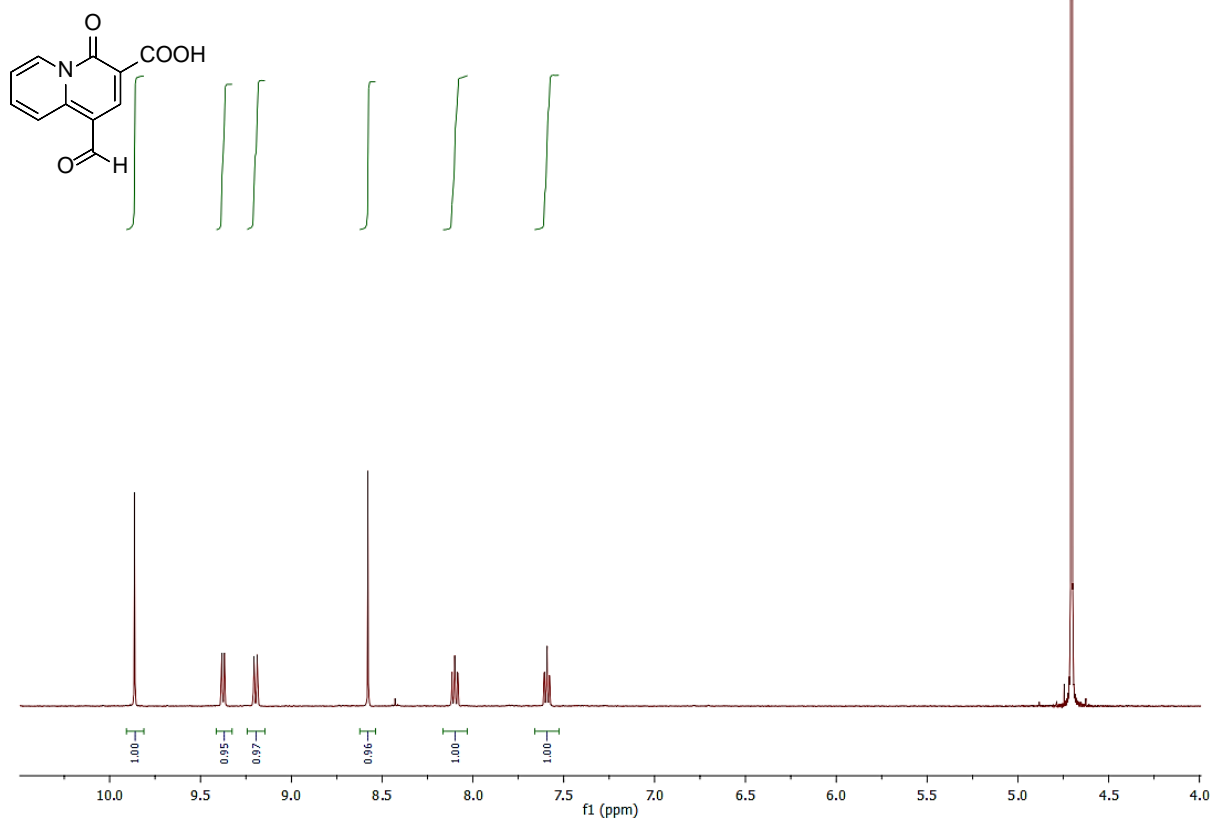

### <sup>13</sup>C-NMR (compound 1)

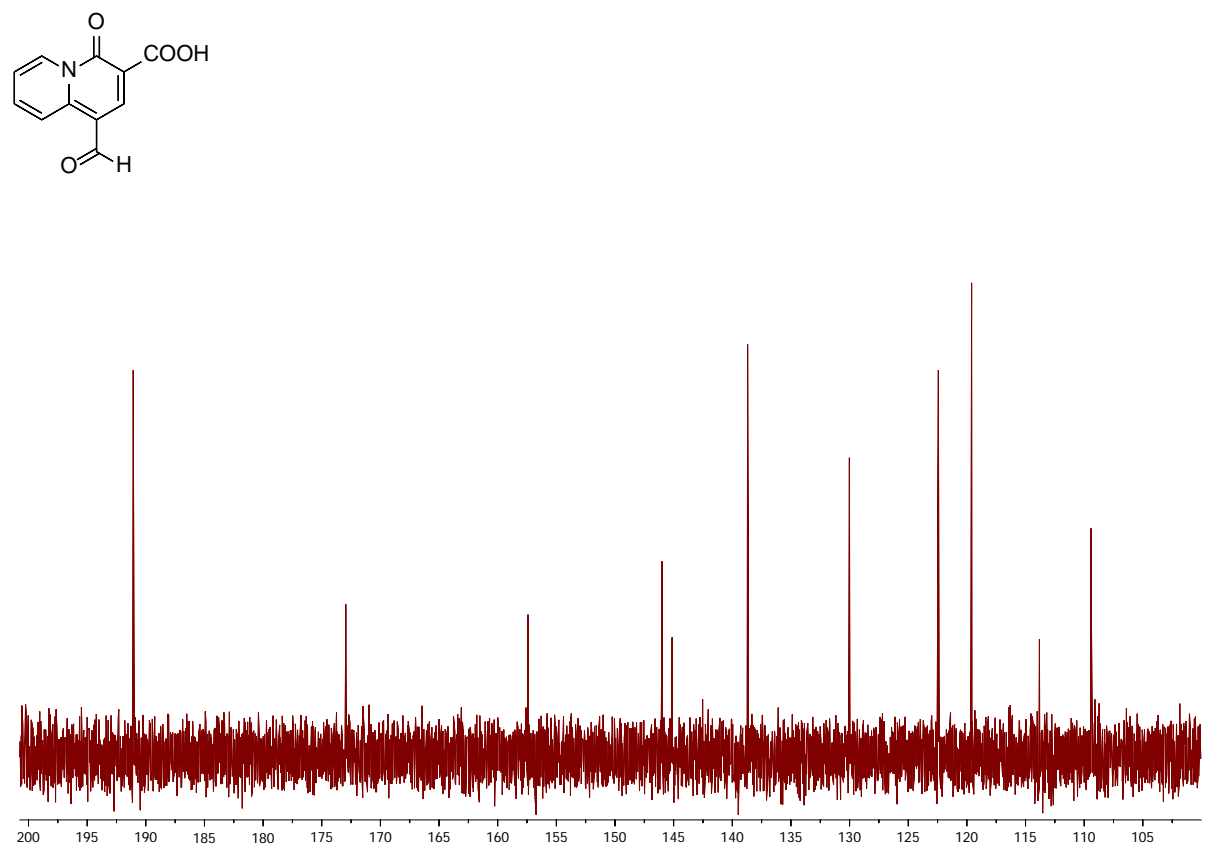

# <sup>1</sup>H-NMR (compound 2)

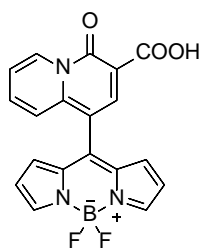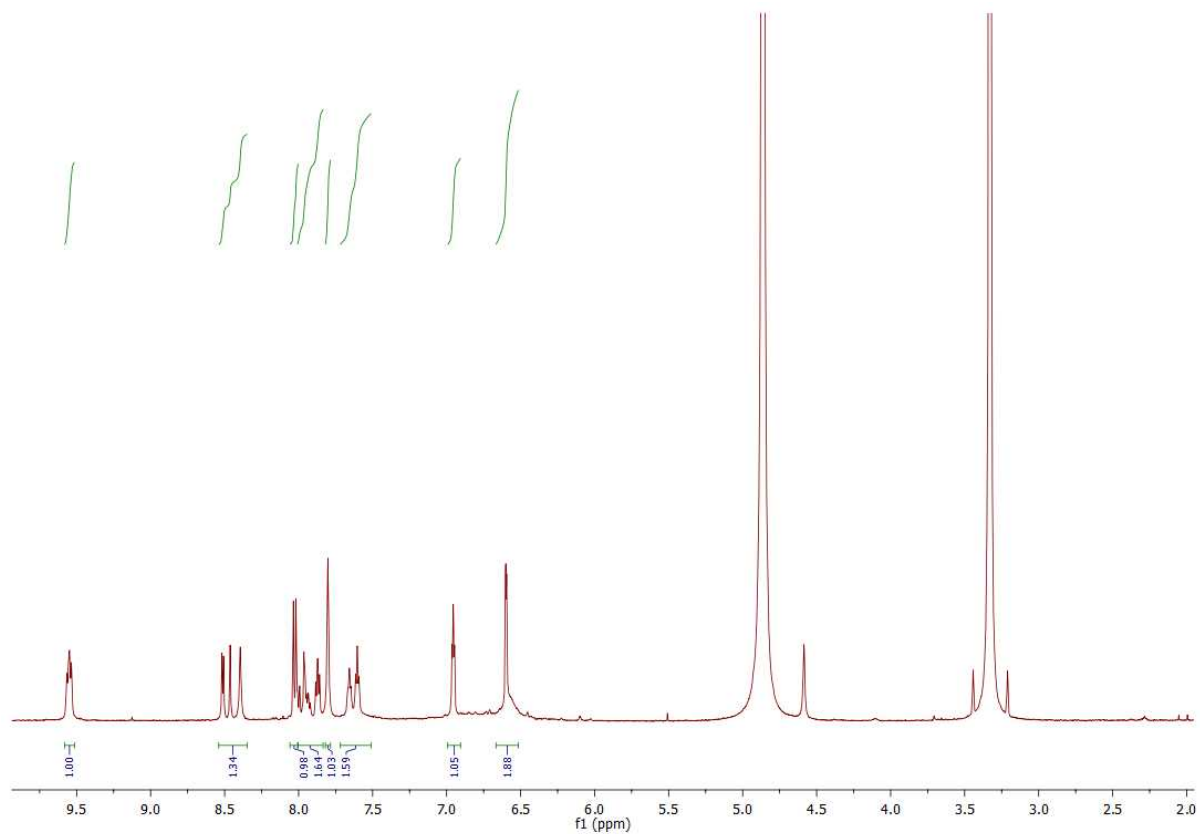

## HSQC (compound 2)

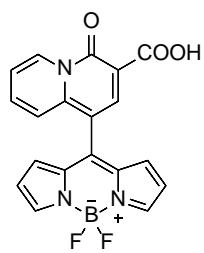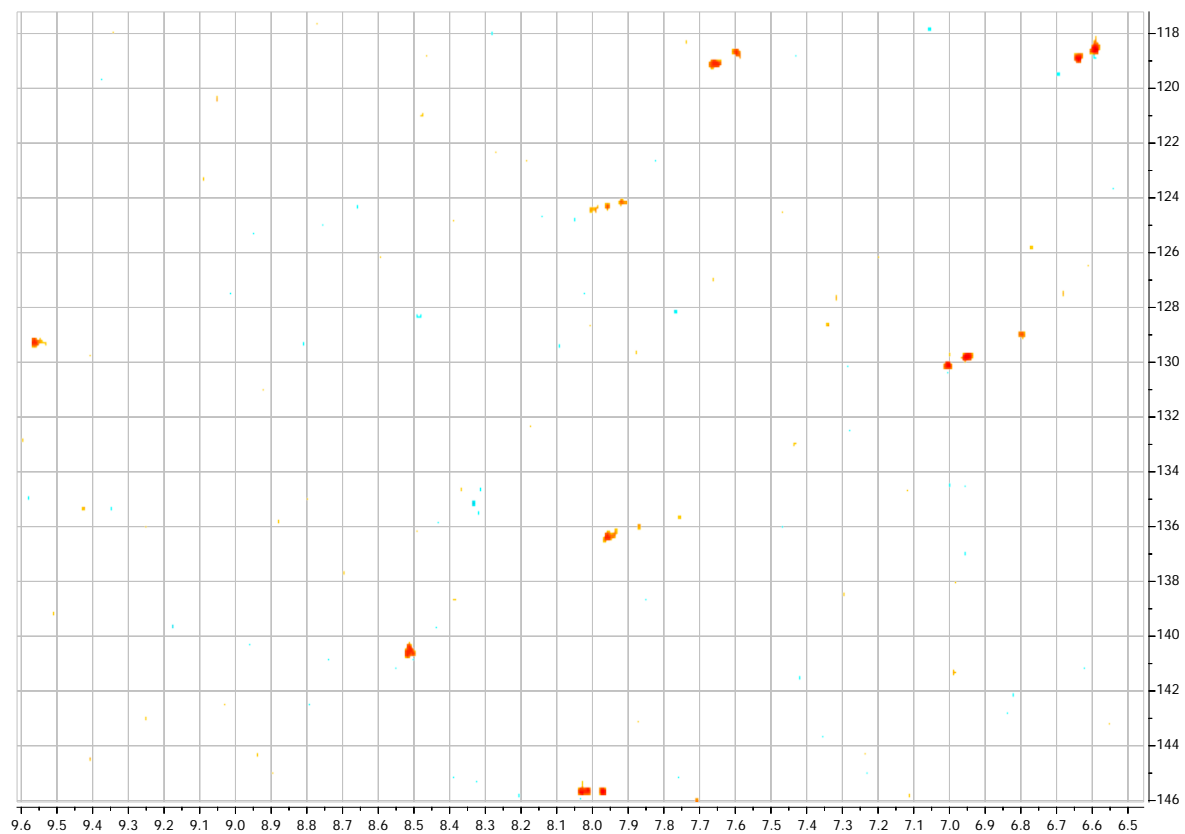

## HMBC (compound 2)

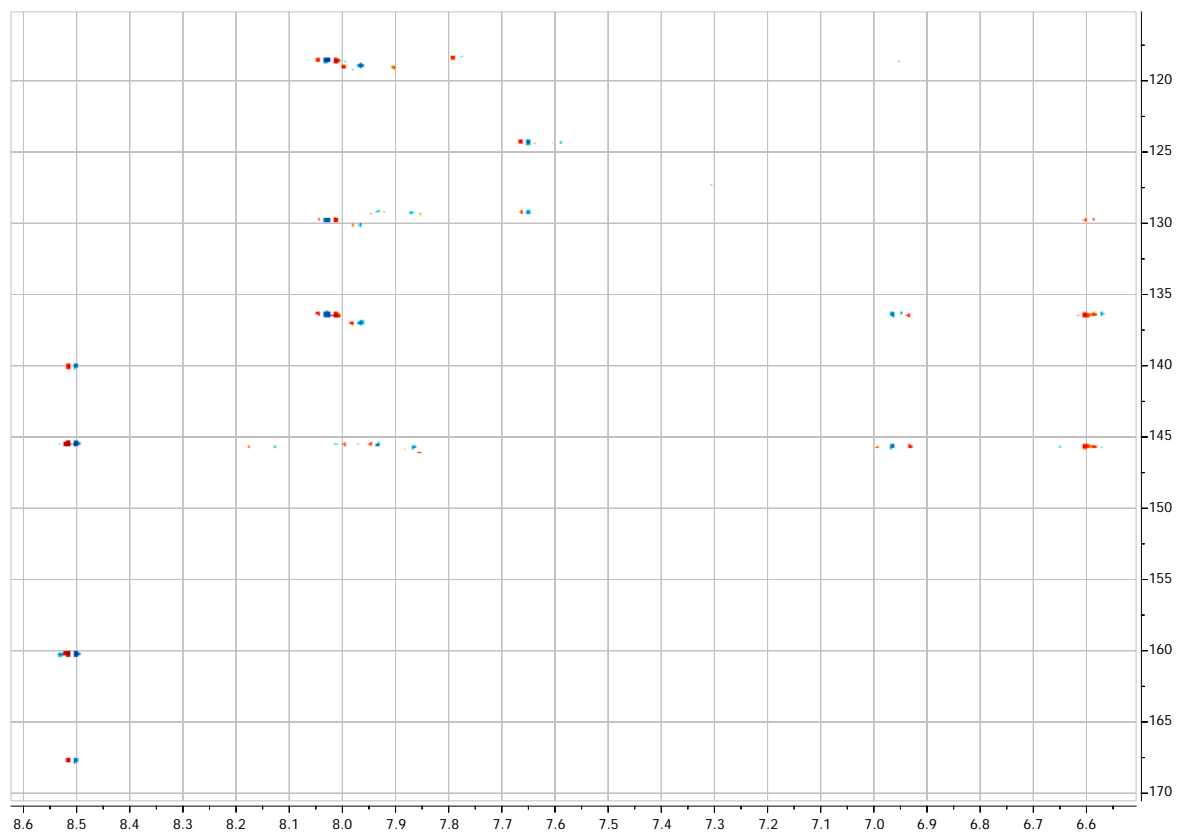

# <sup>1</sup>H-NMR (compound 3)

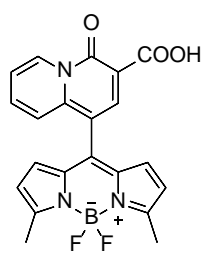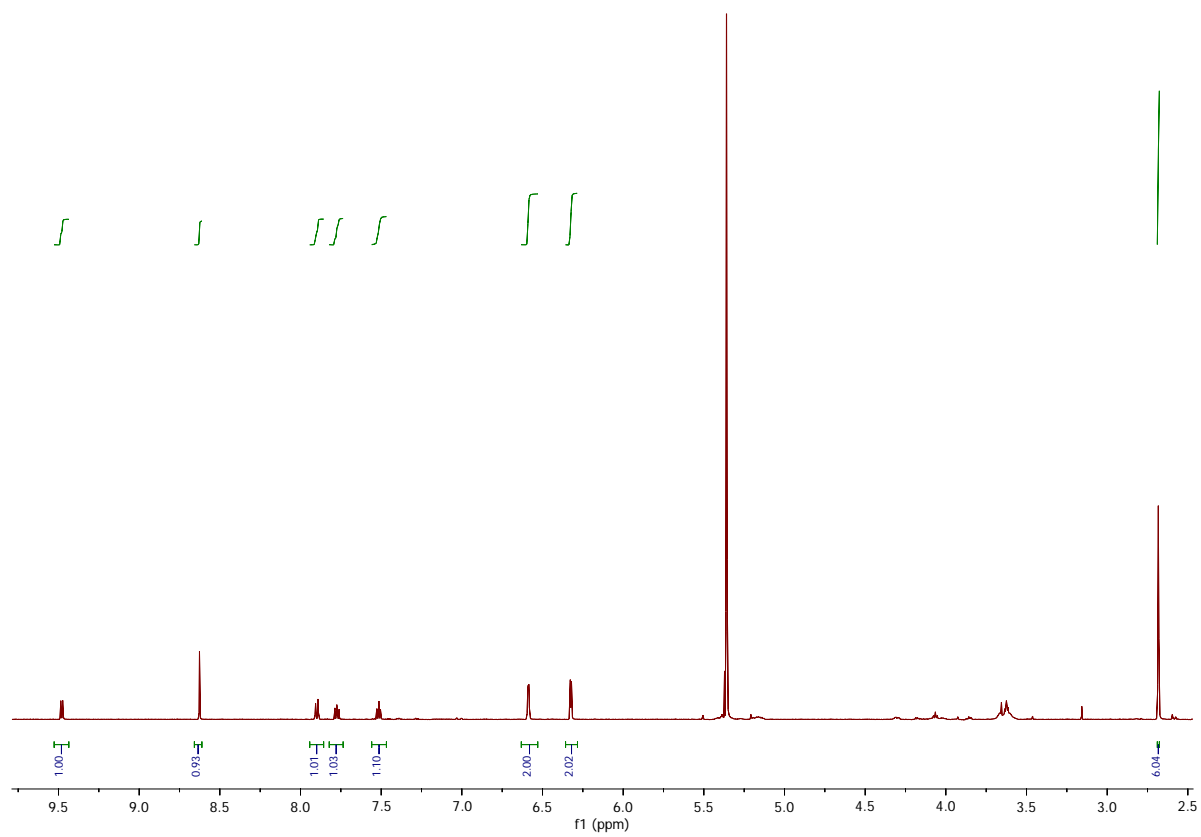

## HSQC (compound 3)

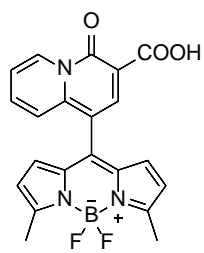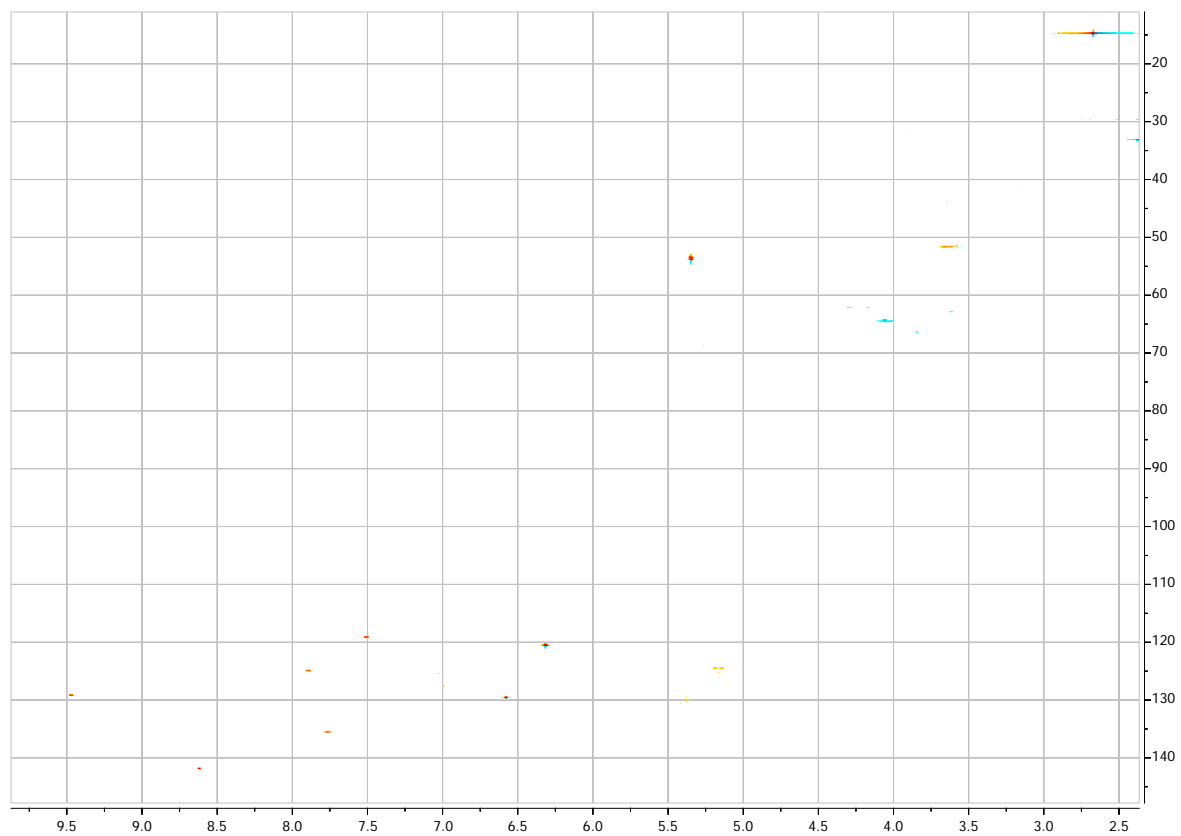

### HSQC (expanded aromatic region) (compound 3)

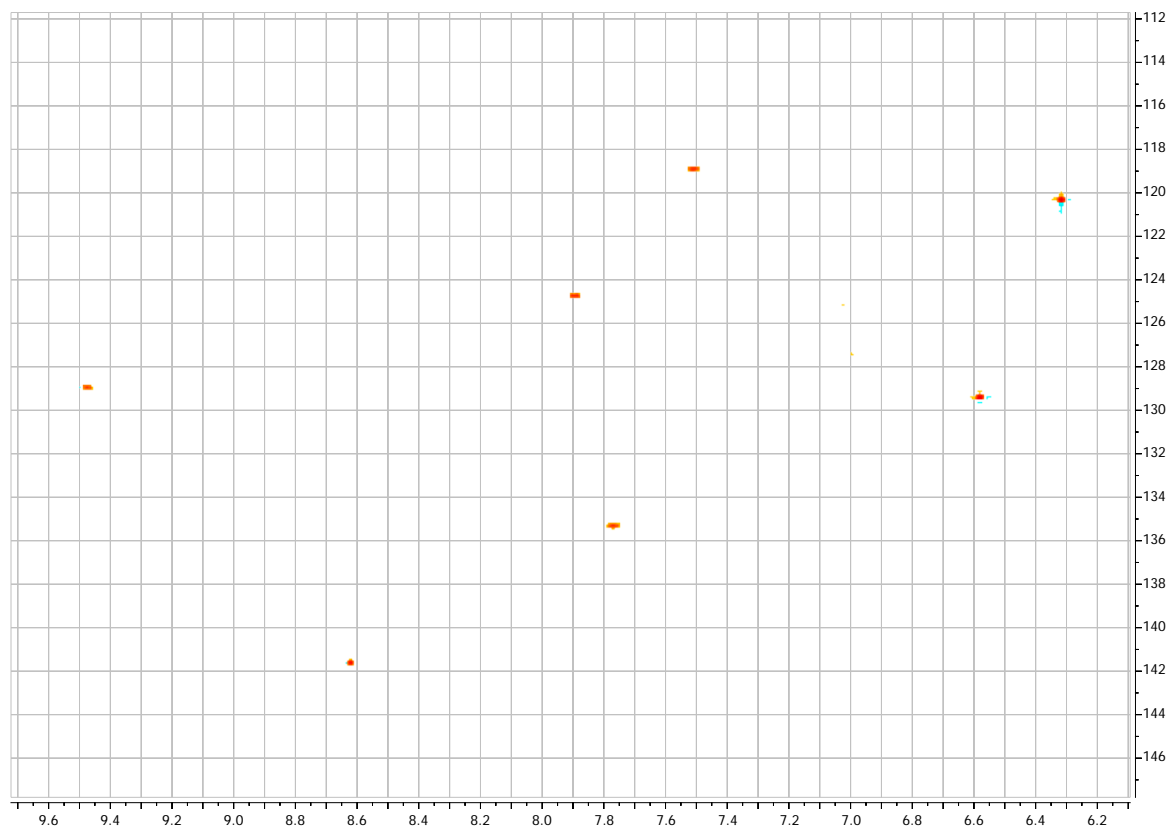

### HMBC (compound 3)

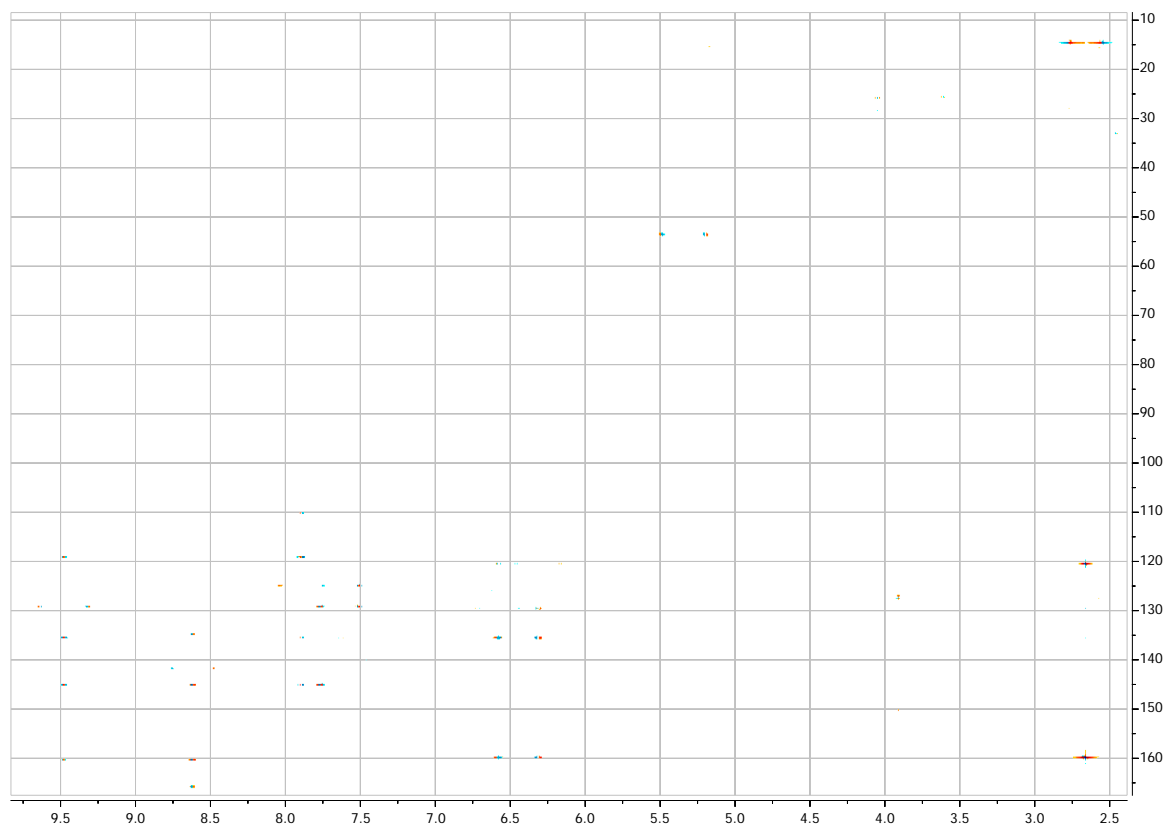



### HMBC (expanded aromatic region) (compound 3)

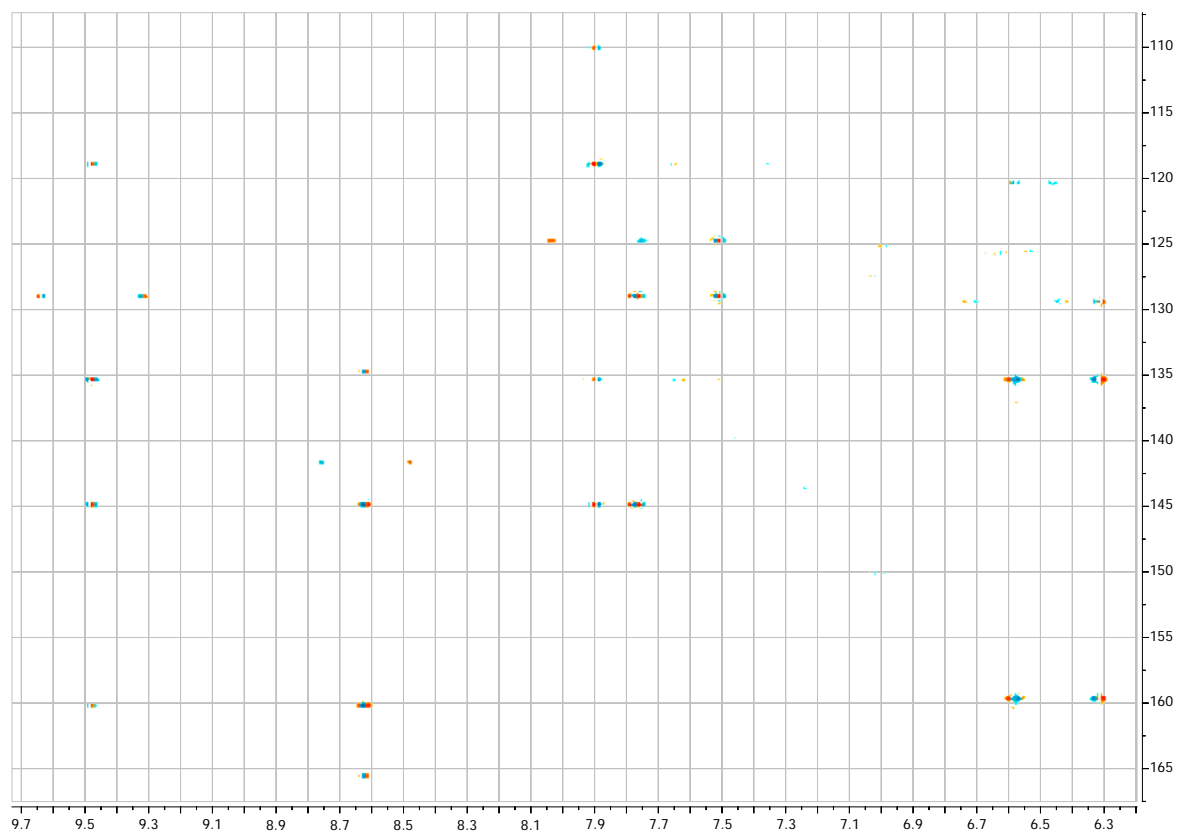

# <sup>1</sup>H-NMR (compound 4)

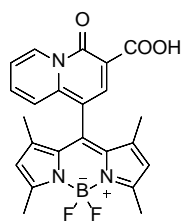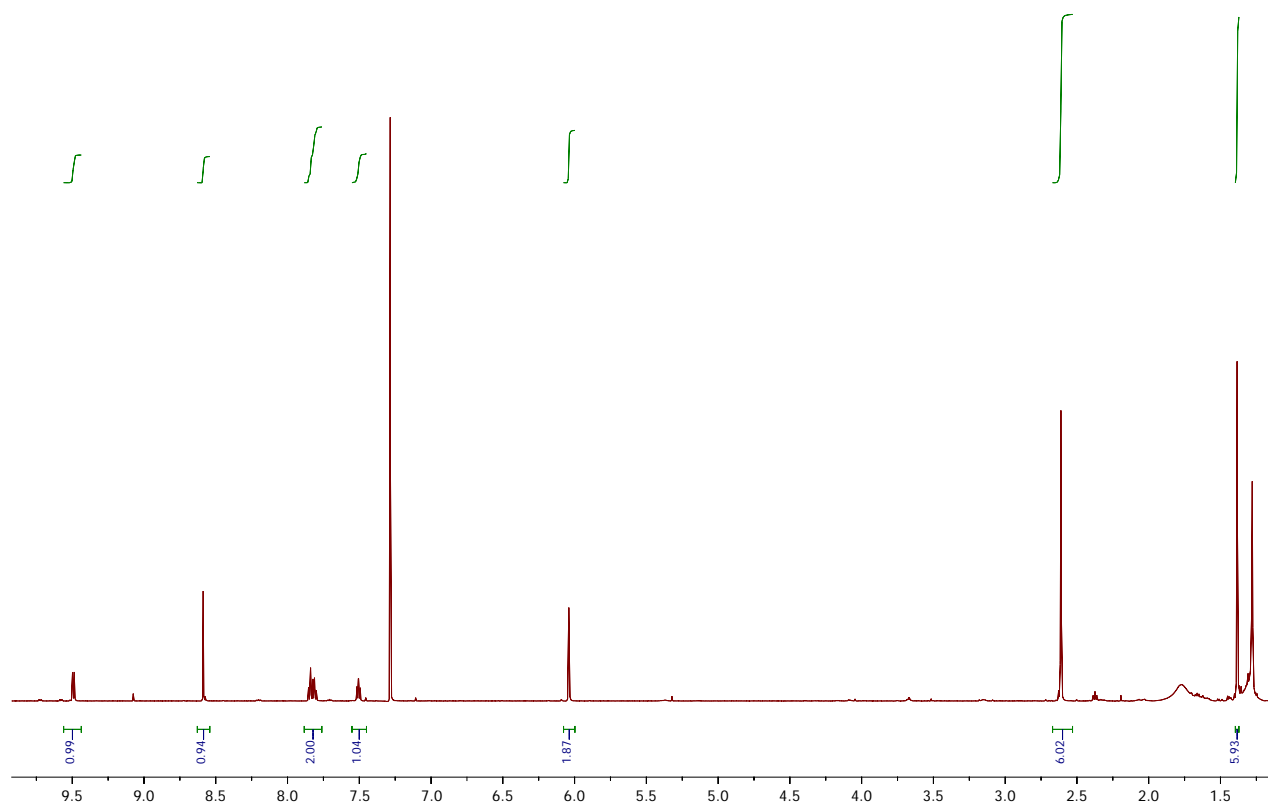



## HSQC (expanded aromatic region) (compound 4)

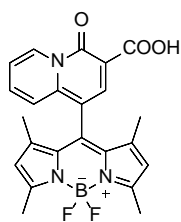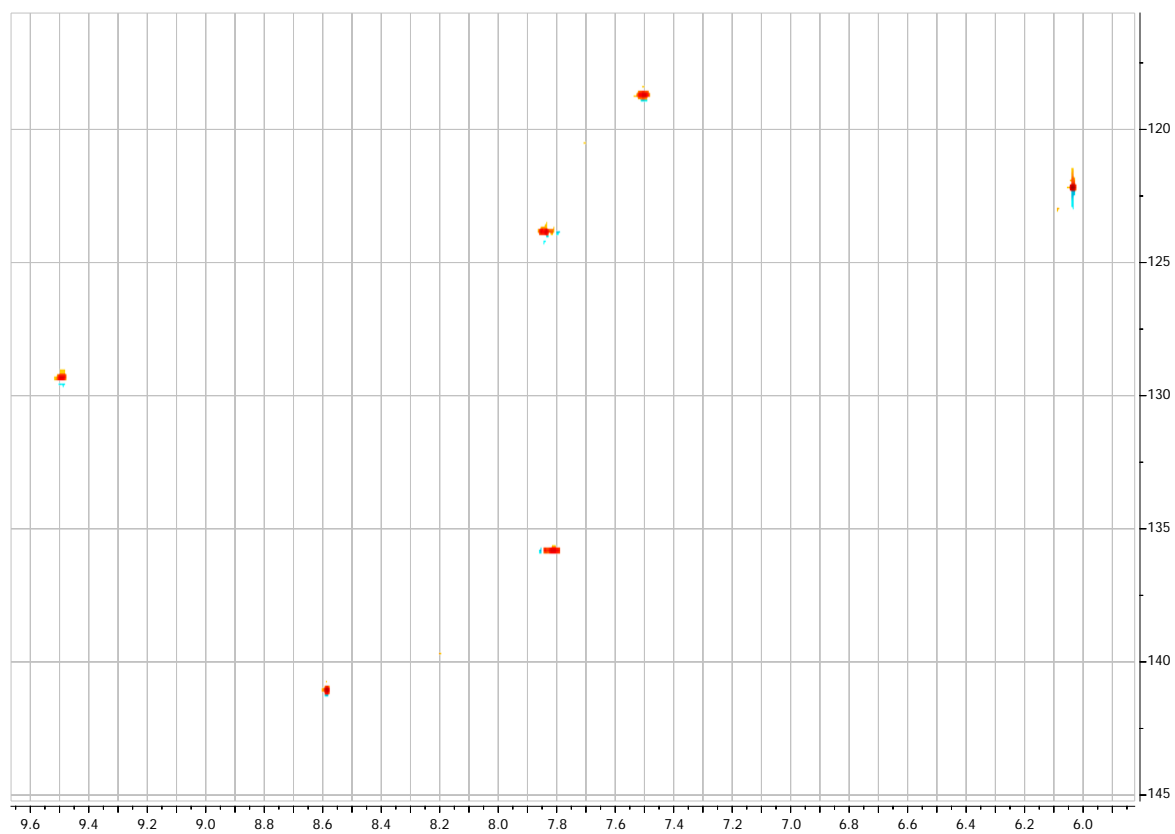

## HMBC (compound 4)

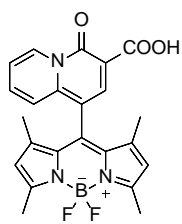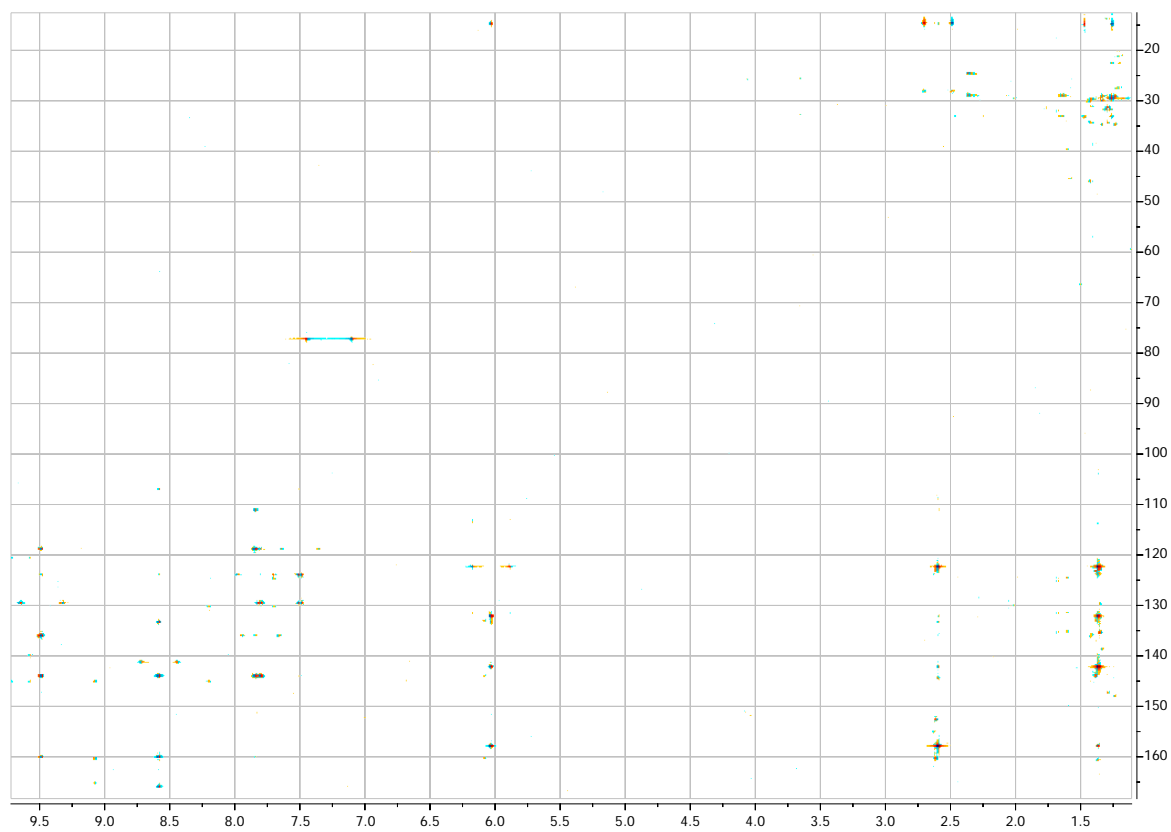

## HMBC (expanded aromatic region) (compound 4)

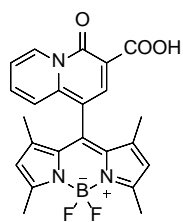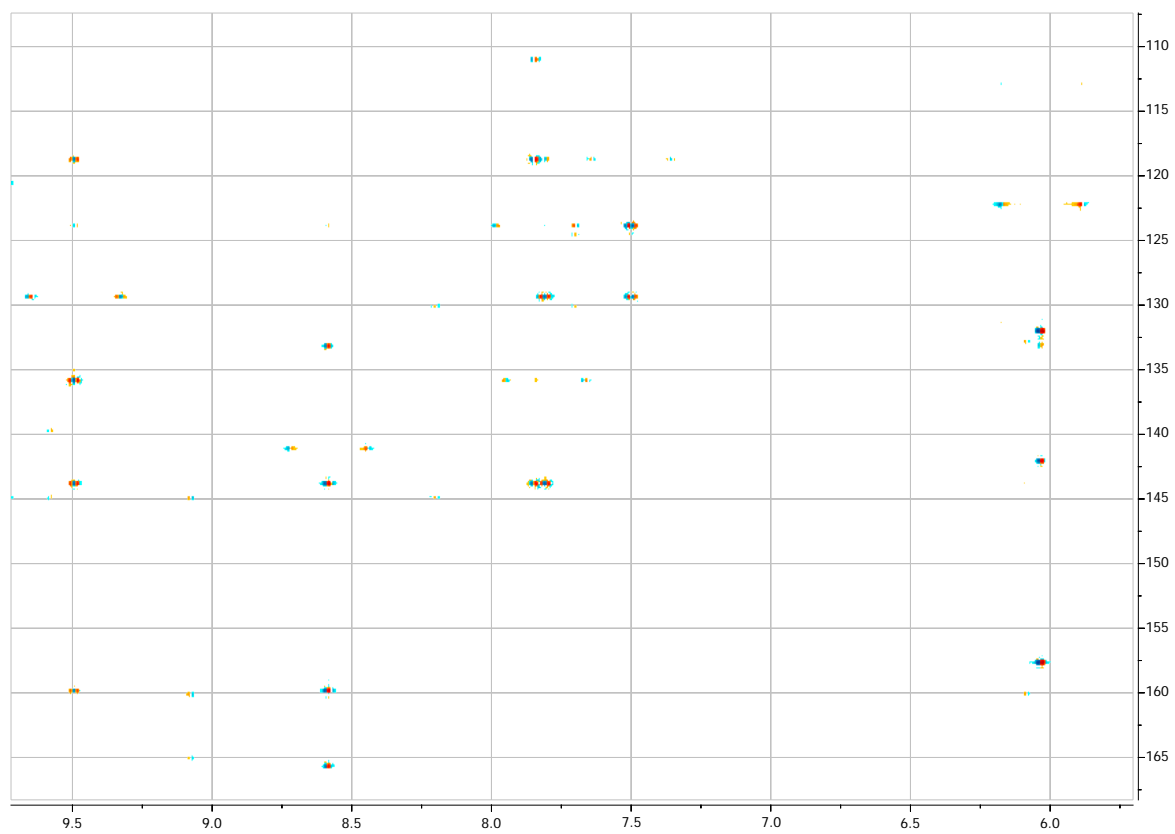

### 3. Additional spectroscopy and imaging data.

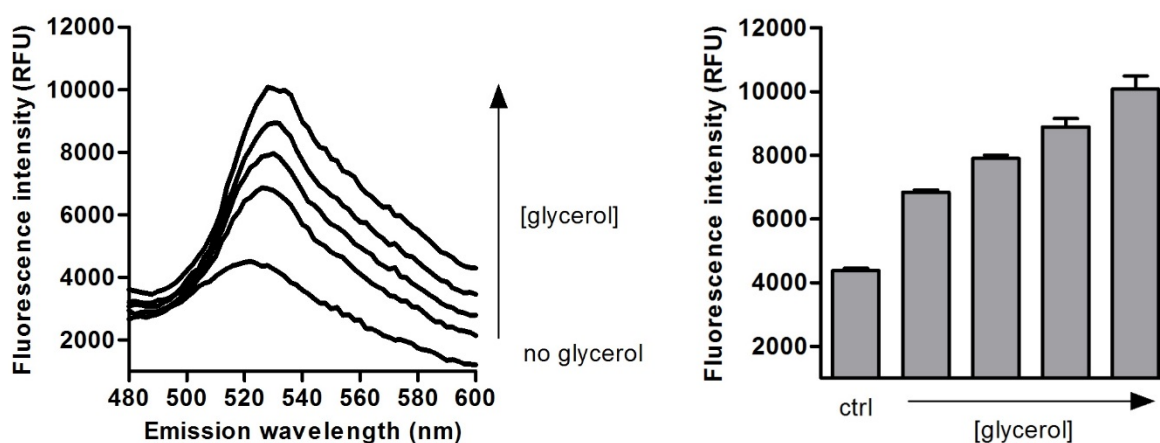

**Figure S1.** Fluorescence spectra ( $\lambda_{exc.}$ : 450 nm) of compound **2** upon incubation without and with increasing concentrations of glycerol.

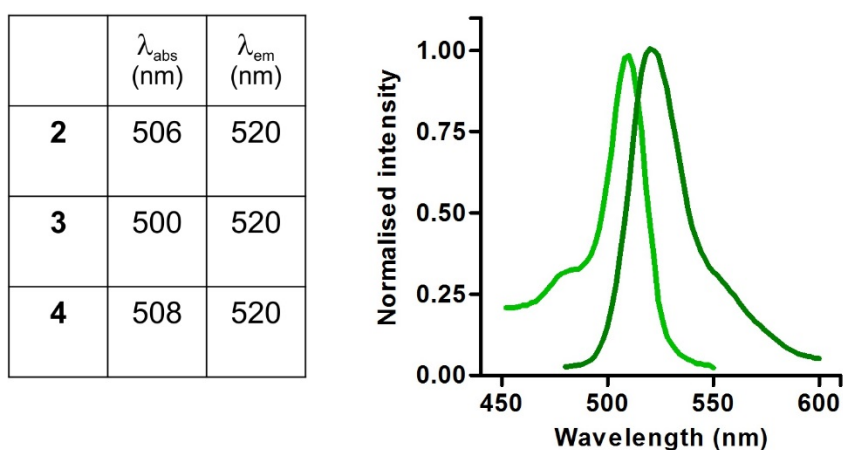

**Figure S2.** Spectral characterisation of the BODIPY compounds **2-4**. For compound **4**, absorbance (clear green line) and emission ( $\lambda_{exc.}$ : 450 nm, dark green line) spectra (10  $\mu$ M) in EtOH.

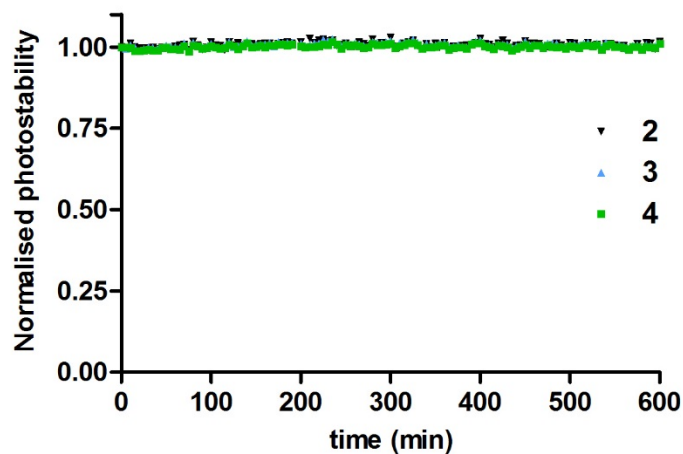

**Figure S3.** Photostability analysis of compounds **2-4** (100  $\mu\text{M}$ ) in PBS upon continuous light irradiation for 10 h.

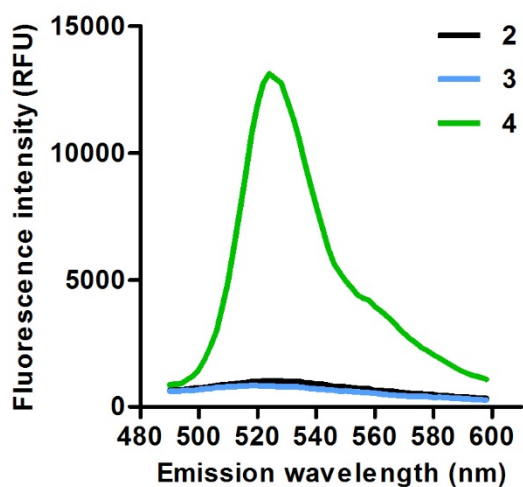

**Figure S4.** Fluorescence spectra ( $\lambda_{\text{exc.}}$ : 450 nm) of compounds **2-4** (20  $\mu\text{M}$ ) upon incubation with the same  $\text{Mg}^{2+}$ -containing solution (2 mM) and under the same experimental conditions.



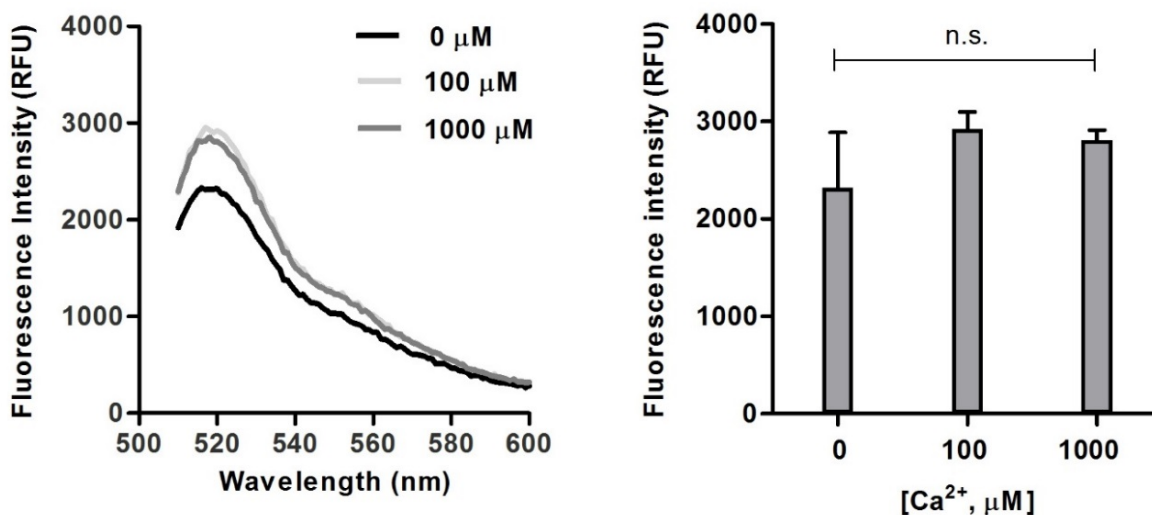

**Figure S5.** Fluorescence spectra ( $\lambda_{exc.}$ : 450 nm) and fluorescence intensity readouts of compound **4** upon incubation with low (100  $\mu$ M) and high (1 mM) concentrations of  $Ca^{2+}$  within its physiological range. Values represented as means  $\pm$  s.e.m ( $n = 3$ ). n.s. for  $p > 0.05$ .

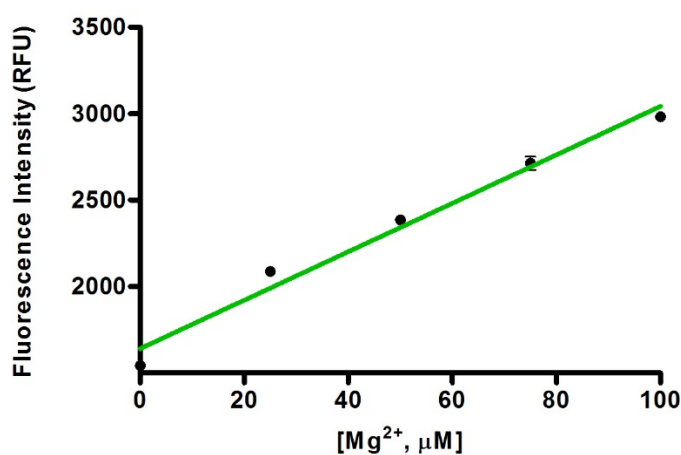

**Figure S6.** Determination of limit of detection of compound **4** for the detection of  $Mg^{2+}$ . Compound **4** (10  $\mu$ M) was incubated with increasing concentrations of  $Mg^{2+}$  and the fluorescence emission was detected at r.t. Values represented as means  $\pm$  s.e.m ( $n = 3$ ), and the limit of detection was determined as 2  $\mu$ M.

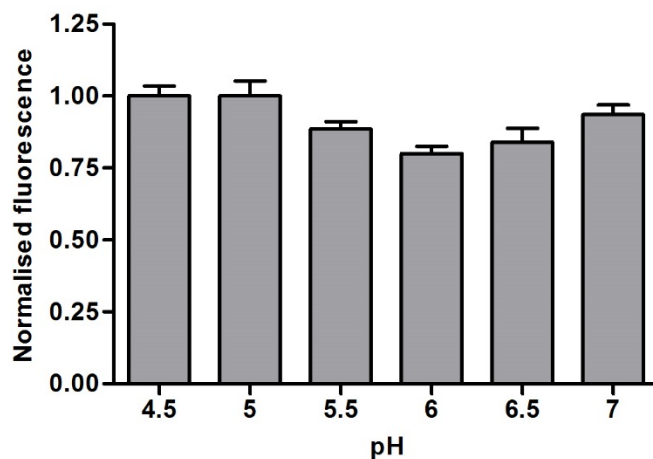

**Figure S7.** Normalised fluorescence intensity of compound **4** (10  $\mu$ M) upon binding to  $Mg^{2+}$  (1 mM) in different buffers covering different pH values measured with  $\pm 0.2$  deviation. Values represented as means  $\pm$  s.d (n = 3).

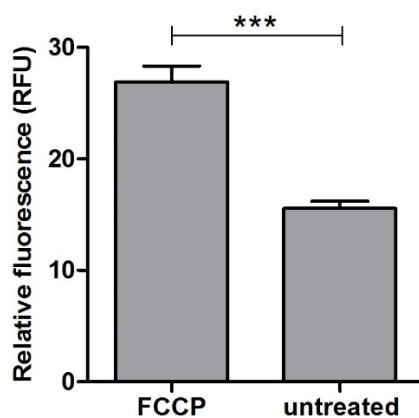

**Figure S8.** Fluorescence intensity quantification of FCCP-treated and untreated A549 cells after incubation with compound **4** (3  $\mu$ M, 15 min). Image analysis was performed using Image J, including 10 regions of interest per condition covering a similar overall area. Values represented as means  $\pm$  s.d. \*\*\* for  $p < 0.001$ .

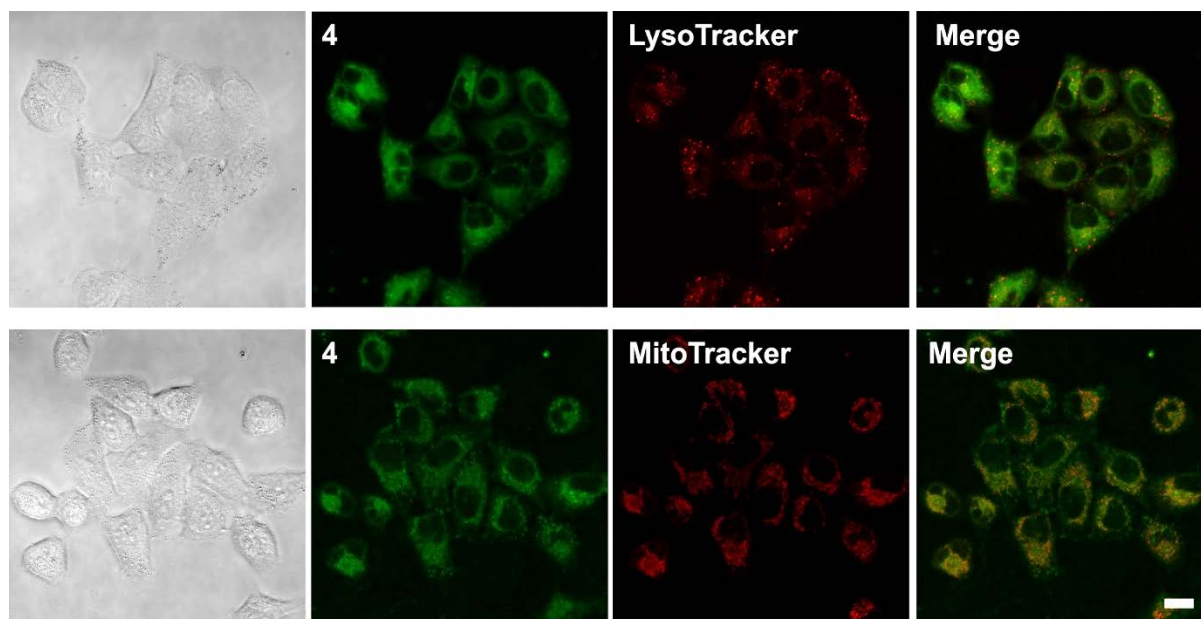

**Figure S9.** Confocal fluorescence microscopy images of A549 cells upon incubation with compound **4** and organelle-specific fluorescent markers. Cells were pre-incubated in culture media containing 5 mM MgCl<sub>2</sub> and then treated with compound **4** (3 μM) and the corresponding trackers for 15 min. Scale bar: 10 μm.

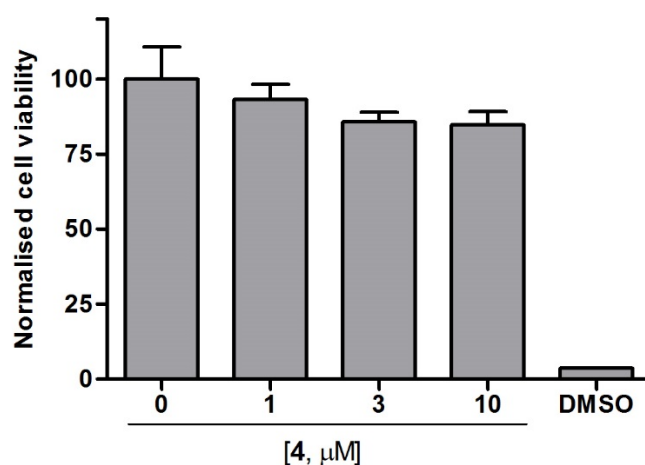

**Figure S10.** Cytotoxicity assays in A549 cells upon incubation with different concentrations of compound **4** and DMSO as a positive control. Cell viability was normalised to cells incubated under the same experimental conditions with only cell culture medium. Values represented as means ± s.d (n = 3).
